# Supplementary material for: Multi-year effect of wetting on CH 4 flux at taiga–tundra boundary in northeastern Siberia deduced from stable isotope ratios of CH 4
Source: Copernicus journal article supplement (doi:10.5194/bg-16-755-2019), 2019-02-11
Supplement: Supplementary file 1 [file bg-16-755-2019-supplement.pdf]

Supplement of Biogeosciences, 16, 755–768, 2019  
<https://doi.org/10.5194/bg-16-755-2019-supplement>  
© Author(s) 2019. This work is distributed under  
the Creative Commons Attribution 4.0 License.

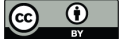

*Supplement of*

**Multi-year effect of wetting on CH<sub>4</sub> flux at taiga–tundra boundary  
in northeastern Siberia deduced from stable isotope ratios of CH<sub>4</sub>**

**Ryo Shingubara et al.**

*Correspondence to:* Atsuko Sugimoto (atsukos@ees.hokudai.ac.jp)

The copyright of individual parts of the supplement might differ from the CC BY 4.0 License.

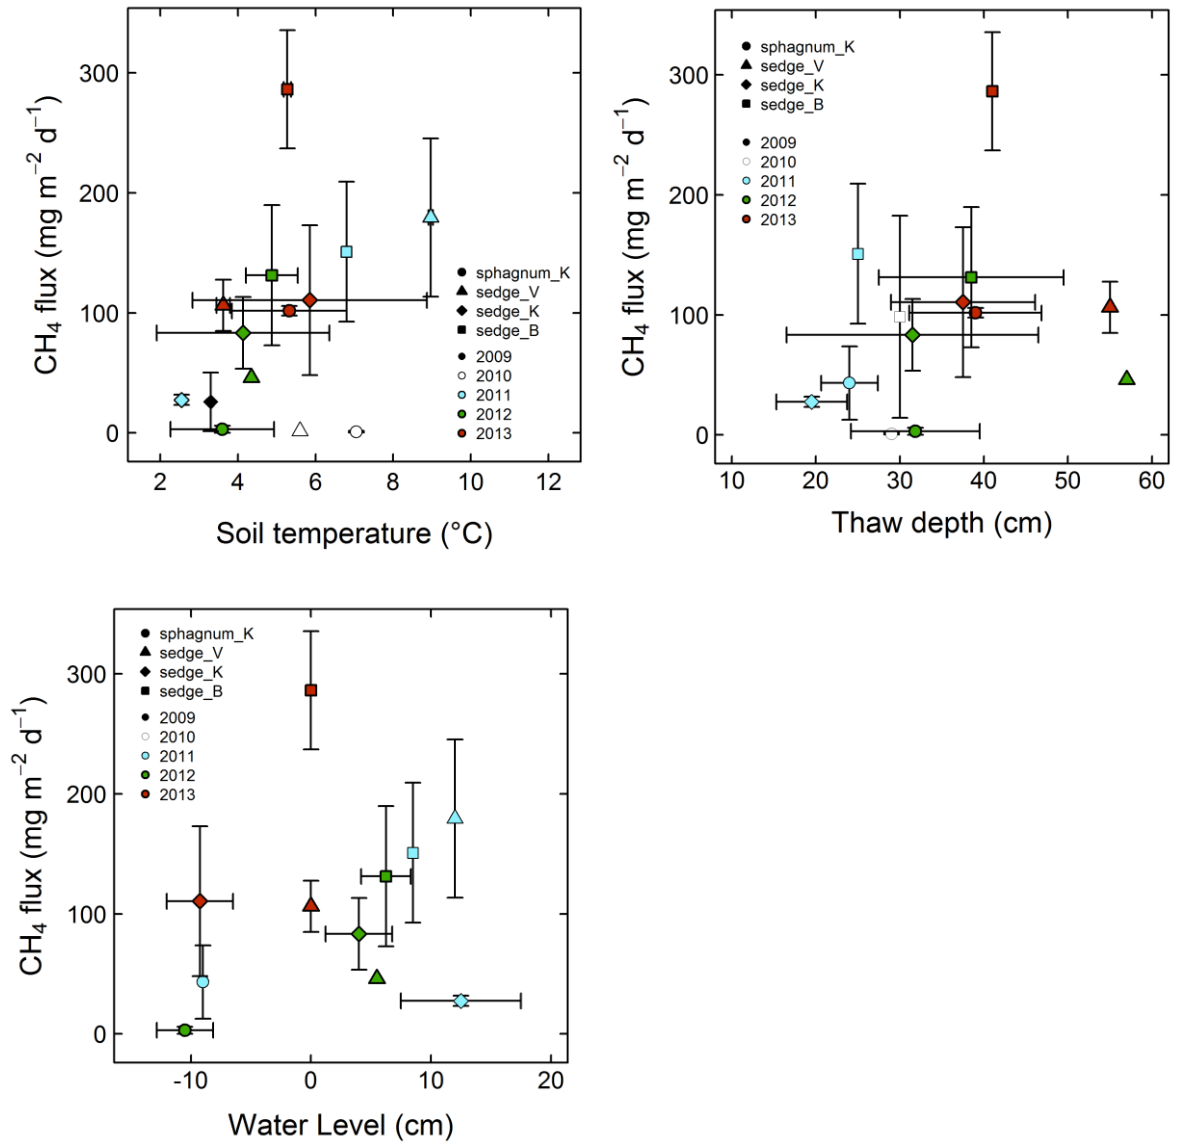

**Figure S1.** Averaged CH<sub>4</sub> flux over each wet area and each year plotted against (a) soil temperature (10 cm depth), (b) thaw depth, and (c) water level. Error bars represent standard deviations. Most observations for soil temperature and thaw depth were conducted at the same time of flux measurements, but not for all (Table S1).

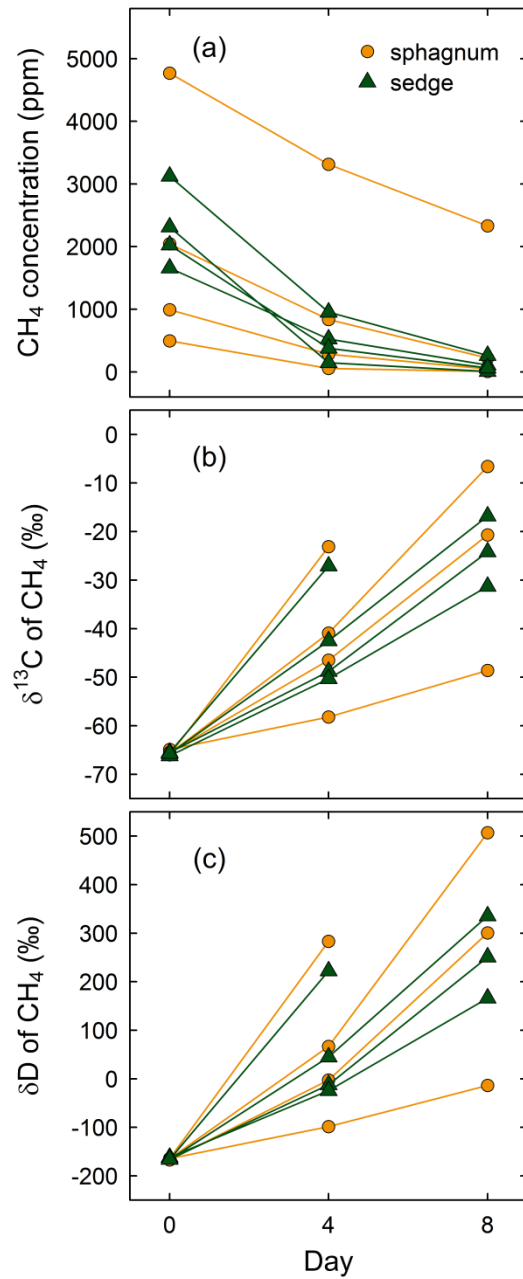

**Figure S2.** Temporal changes in (a) concentration, (b)  $\delta^{13}\text{C}$ , and (c)  $\delta\text{D}$  of the remaining headspace  $\text{CH}_4$  in the soil incubation experiment for  $\text{CH}_4$  production. Surface organic layers (0-13 cm) from wet areas (sphagnum\_K and sedge\_K) were incubated in quadruplicate at 8 °C.

**Table S1.** Thaw depths in tree mound and wet area observed along with CH<sub>4</sub> flux from 2010 to 2013. Averaged values and ranges are shown for each vegetation type and each year. Standard deviations are represented when  $n \geq 3$ . See Table S2 for each observation date.

| Year | Thaw depth (cm)     |                        |                                   |                                     |
|------|---------------------|------------------------|-----------------------------------|-------------------------------------|
|      | Tree mound          |                        | Wet area                          |                                     |
|      | mean                | range                  | mean                              | range                               |
| 2010 | 23 ( $n = 2$ )      | 21–25 (Jul 20–21)      | 30 ( $n = 2$ )                    | 29–30 (Jul 20–21)                   |
| 2011 | 23 ± 6 ( $n = 6$ )  | 14–30 (Jul 9–30)       | 22 ± 4 ( $n = 9$ )                | 15–28 (Jul 9–21)                    |
| 2012 | 21 ± 4 ( $n = 11$ ) | 16–27 (Jul 3 – Aug 9)  | 35 ± 14 ( $n = 24$ ) <sup>a</sup> | 9–57 (Jul 3 – Aug 9) <sup>a</sup>   |
| 2013 | 20 ± 3 ( $n = 3$ )  | 18–23 (Jul 15 – Aug 2) | 40 ± 9 ( $n = 20$ ) <sup>b</sup>  | 23–58 (Jul 11 – Aug 2) <sup>b</sup> |

<sup>a</sup> During Jul 8–20, 2012 in wet area, the mean value was 25 ± 8 cm, and the range was 9–37 cm.

<sup>b</sup> During Jul 11–18, 2013 in wet area, the mean value was 35 ± 7 cm, and the range was 23–46 cm.

**Table S2.** Averaged CH<sub>4</sub> flux (in mg CH<sub>4</sub> m<sup>-2</sup> day<sup>-1</sup>) over each observation point and each year (2009–2013). Standard deviations are shown in case of  $n \geq 3$ . Dates of the flux observation are indicated in parenthesis. Superscripts represent observed environmental variables on each day: a) soil temperature (2009–2013), b) thaw depth (2010–2013), c) water level (2011–2013), and d) volumetric water content in surface soil (2011).

| Observation points       | Year                              |                                   |                                                                                                   |                                                                                                                                                                                  |                                                                                                     |
|--------------------------|-----------------------------------|-----------------------------------|---------------------------------------------------------------------------------------------------|----------------------------------------------------------------------------------------------------------------------------------------------------------------------------------|-----------------------------------------------------------------------------------------------------|
|                          | 2009                              | 2010                              | 2011                                                                                              | 2012                                                                                                                                                                             | 2013                                                                                                |
| tree mound_V             | –                                 | 0<br>(Jul 16)                     | -1 ± 2<br>(Jul 23 <sup>b</sup> , 29 <sup>abd</sup> )                                              | 0<br>(Aug 7 <sup>ab</sup> )                                                                                                                                                      | 0<br>(Aug 2 <sup>ab</sup> )                                                                         |
| sedge_V<br>(wet area)    | 3 ± 3<br>(Jul 23)                 | 2<br>(Jul 16 <sup>a</sup> )       | 179 ± 66<br>(Jul 23 <sup>c</sup> , 29 <sup>acd</sup> )                                            | 46<br>(Aug 7 <sup>abc</sup> )                                                                                                                                                    | 106 ± 21<br>(Aug 2 <sup>abc</sup> )                                                                 |
| tree mound_K             | 0<br>(Jul 22)                     | -1 ± 3<br>(Jul 21 <sup>ab</sup> ) | 0<br>(Jul 15 <sup>bd</sup> , 18 <sup>bd</sup> )                                                   | 0<br>(Jul 3 <sup>ab</sup> , 8 <sup>a</sup> , 12 <sup>ab</sup> , 24 <sup>ab</sup> ;<br>Aug 2 <sup>ab</sup> , 6 <sup>ab</sup> )                                                    | 1<br>(Jul 15 <sup>ab</sup> )                                                                        |
| sphagnum_K<br>(wet area) | –                                 | 1 ± 1<br>(Jul 21 <sup>ab</sup> )  | 43 ± 31<br>(Jul 11 <sup>bd</sup> , 17 <sup>b</sup> ,<br>18 <sup>bcd</sup> , 21 <sup>bcd</sup> )   | 3 ± 3<br>(Jul 3 <sup>abc</sup> , 8 <sup>abc</sup> , 12 <sup>abc</sup> ,<br>24 <sup>abc</sup> ; Aug 2 <sup>abc</sup> , 6 <sup>abc</sup> )                                         | 102 ± 4<br>(Jul 11 <sup>ab</sup> , 18 <sup>ab</sup> ,<br>25 <sup>ab</sup> , 31 <sup>ab</sup> )      |
| sedge_K<br>(wet area)    | 26 ± 24<br>(Jul 22 <sup>a</sup> ) | –                                 | 28 ± 4<br>(Jul 11 <sup>bcd</sup> , 17 <sup>bc</sup> ,<br>18 <sup>bcd</sup> , 21 <sup>abcd</sup> ) | 83 ± 30<br>(Jul 3 <sup>abc</sup> , 8 <sup>abc</sup> , 12 <sup>abc</sup> , 20 <sup>abc</sup> ,<br>21 <sup>a</sup> , 24 <sup>abc</sup> ; Aug 2 <sup>abc</sup> , 6 <sup>abc</sup> ) | 111 ± 63<br>(Jul 11 <sup>abc</sup> , 18 <sup>abc</sup> ,<br>25 <sup>abc</sup> , 31 <sup>abc</sup> ) |
| tree mound_B             | –                                 | 0<br>(Jul 20 <sup>b</sup> )       | 0<br>(Jul 9 <sup>bd</sup> , 30 <sup>bd</sup> )                                                    | -1 ± 1<br>(Jul 13 <sup>ab</sup> , Aug 9 <sup>ab</sup> )                                                                                                                          | 0<br>(Jul 16 <sup>ab</sup> )                                                                        |
| sedge_B<br>(wet area)    | 79 ± 80<br>(Jul 25)               | 98 ± 84<br>(Jul 20 <sup>b</sup> ) | 151 ± 58<br>(Jul 9 <sup>bcd</sup> , 30 <sup>acd</sup> )                                           | 131 ± 58<br>(Jul 13 <sup>ab</sup> , Aug 9 <sup>abc</sup> )                                                                                                                       | 286 ± 49<br>(Jul 16 <sup>abc</sup> )                                                                |

**Table S3.** Concentration,  $\delta^{13}\text{C}$ , and  $\delta\text{D}$  of dissolved  $\text{CH}_4$  in surface water and soil pore water averaged over each wet area and each year. Standard deviations are shown in case of  $n \geq 3$ .

| Wet area   | Depth         | Concentration ( $\mu\text{mol CH}_4 \text{L}^{-1}$ ) |                              |                              | $\delta^{13}\text{C}$ (‰)      |                             |                             | $\delta\text{D}$ (‰)         |                              |                              |
|------------|---------------|------------------------------------------------------|------------------------------|------------------------------|--------------------------------|-----------------------------|-----------------------------|------------------------------|------------------------------|------------------------------|
|            |               | 2011                                                 | 2012                         | 2013                         | 2011                           | 2012                        | 2013                        | 2011                         | 2012                         | 2013                         |
| sphagnum_K | surface water | —                                                    | —                            | —                            | —                              | —                           | —                           | —                            | —                            | —                            |
|            | 10 cm         | $6 \pm 3$<br>( $n = 6$ )                             | 318<br>( $n = 1$ )           | —                            | $-56 \pm 9$<br>( $n = 6$ )     | -48<br>( $n = 1$ )          | —                           | $-380 \pm 23$<br>( $n = 6$ ) | -408<br>( $n = 1$ )          | —                            |
|            | 20 cm         | —                                                    | $176 \pm 125$<br>( $n = 3$ ) | $399 \pm 68$<br>( $n = 3$ )  | —                              | $-55 \pm 10$<br>( $n = 3$ ) | $-47 \pm 2$<br>( $n = 3$ )  | —                            | $-412 \pm 4$<br>( $n = 3$ )  | $-412 \pm 3$<br>( $n = 3$ )  |
|            | 30 cm         | —                                                    | 266<br>( $n = 2$ )           | 351<br>( $n = 1$ )           | —                              | -49<br>( $n = 2$ )          | -50<br>( $n = 1$ )          | —                            | -407<br>( $n = 2$ )          | -406<br>( $n = 1$ )          |
| sedge_V    | surface water | $3 \pm 2$<br>( $n = 3$ )                             | 6<br>( $n = 2$ )             | 105<br>( $n = 2$ )           | $-58.1 \pm 0.2$<br>( $n = 3$ ) | -56<br>( $n = 2$ )          | -60<br>( $n = 2$ )          | $-378 \pm 7$<br>( $n = 3$ )  | -383<br>( $n = 1$ )          | -414<br>( $n = 2$ )          |
|            | 10 cm         | $30 \pm 17$<br>( $n = 3$ )                           | 150<br>( $n = 1$ )           | 249<br>( $n = 1$ )           | -59<br>( $n = 2$ )             | -51<br>( $n = 1$ )          | -46<br>( $n = 1$ )          | -405<br>( $n = 2$ )          | -409<br>( $n = 1$ )          | -415<br>( $n = 1$ )          |
|            | 20 cm         | —                                                    | 52<br>( $n = 1$ )            | 168<br>( $n = 1$ )           | —                              | -53<br>( $n = 1$ )          | -51<br>( $n = 1$ )          | —                            | -405<br>( $n = 1$ )          | -416<br>( $n = 1$ )          |
|            | 30 cm         | —                                                    | —                            | —                            | —                              | —                           | —                           | —                            | —                            | —                            |
| sedge_K    | surface water | $12 \pm 14$<br>( $n = 4$ )                           | $8 \pm 8$<br>( $n = 11$ )    | $74 \pm 27$<br>( $n = 6$ )   | $-46 \pm 4$<br>( $n = 4$ )     | $-51 \pm 9$<br>( $n = 10$ ) | $-45 \pm 3$<br>( $n = 6$ )  | $-378 \pm 27$<br>( $n = 4$ ) | $-349 \pm 30$<br>( $n = 4$ ) | $-388 \pm 11$<br>( $n = 6$ ) |
|            | 10 cm         | $53 \pm 31$<br>( $n = 6$ )                           | $244 \pm 143$<br>( $n = 7$ ) | $88 \pm 27$<br>( $n = 5$ )   | $-50 \pm 1$<br>( $n = 6$ )     | $-52 \pm 3$<br>( $n = 7$ )  | $-49 \pm 4$<br>( $n = 5$ )  | $-412 \pm 4$<br>( $n = 6$ )  | $-405 \pm 21$<br>( $n = 7$ ) | $-392 \pm 11$<br>( $n = 5$ ) |
|            | 20 cm         | —                                                    | $368 \pm 59$<br>( $n = 3$ )  | $431 \pm 123$<br>( $n = 5$ ) | —                              | $-46 \pm 1$<br>( $n = 3$ )  | $-54 \pm 10$<br>( $n = 5$ ) | —                            | $-412 \pm 1$<br>( $n = 3$ )  | $-407 \pm 4$<br>( $n = 5$ )  |
|            | 30 cm         | —                                                    | 519<br>( $n = 2$ )           | $450 \pm 55$<br>( $n = 3$ )  | —                              | -50<br>( $n = 2$ )          | $-49 \pm 2$<br>( $n = 3$ )  | —                            | -412<br>( $n = 2$ )          | $-400 \pm 2$<br>( $n = 3$ )  |
| sedge_B    | surface water | 14<br>( $n = 2$ )                                    | $8 \pm 14$<br>( $n = 3$ )    | 4<br>( $n = 2$ )             | -40<br>( $n = 2$ )             | -56<br>( $n = 1$ )          | -48<br>( $n = 2$ )          | -320<br>( $n = 2$ )          | -392<br>( $n = 1$ )          | -350<br>( $n = 1$ )          |
|            | 10 cm         | 21<br>( $n = 2$ )                                    | 380<br>( $n = 1$ )           | 392<br>( $n = 1$ )           | -47<br>( $n = 2$ )             | -53<br>( $n = 1$ )          | -51<br>( $n = 1$ )          | -360<br>( $n = 2$ )          | -405<br>( $n = 1$ )          | -404<br>( $n = 1$ )          |
|            | 20 cm         | —                                                    | 351<br>( $n = 2$ )           | 322<br>( $n = 1$ )           | —                              | -54<br>( $n = 2$ )          | -53<br>( $n = 1$ )          | —                            | -404<br>( $n = 2$ )          | -406<br>( $n = 1$ )          |
|            | 30 cm         | —                                                    | —                            | 194<br>( $n = 1$ )           | —                              | —                           | -53<br>( $n = 1$ )          | —                            | —                            | -405<br>( $n = 1$ )          |

**Table S4.** Individual values of water level, dissolved CH<sub>4</sub> concentration (10 cm depth), and δ<sup>13</sup>C and δD of dissolved CH<sub>4</sub> (10 cm depth) observed in each wet area on each date in 2011. Duplicated data are shown in some cases. Although water level increased during July 2011, clear temporal change was not found in the delta values.

| Observation point | Date in 2011 | Water level (cm) | Dissolved CH <sub>4</sub> concentration (μmol L <sup>-1</sup> ) | δ <sup>13</sup> C of dissolved CH <sub>4</sub> (‰) | δD of dissolved CH <sub>4</sub> (‰) |
|-------------------|--------------|------------------|-----------------------------------------------------------------|----------------------------------------------------|-------------------------------------|
| sphagnum_K        | Jul 17       | — (< 0)          | 6, 8                                                            | -43, -58                                           | -386, -394                          |
|                   | Jul 18       | -10              | 2, 2                                                            | -56, -51                                           | -363, -341                          |
|                   | Jul 21       | -8               | 8, 9                                                            | -66, -65                                           | -398, -395                          |
| sedge_V           | Jul 23       | 10               | 16                                                              | -58                                                | -409                                |
|                   | Jul 29       | 14               | 49, 26                                                          | -60                                                | -401                                |
| sedge_K           | Jul 11       | 5                | —                                                               | —                                                  | —                                   |
|                   | Jul 17       | 15               | 27, 37                                                          | -50, -52                                           | -407, -408                          |
|                   | Jul 18       | 15               | 32, 35                                                          | -51, -50                                           | -413, -414                          |
|                   | Jul 21       | 15               | 88, 97                                                          | -49, -49                                           | -415, -415                          |
| sedge_B           | Jul 9        | 6                | —                                                               | —                                                  | —                                   |
|                   | Jul 30       | 11               | 17, 26                                                          | -45, -49                                           | -350, -369                          |

**Table S5.** Phylogenic composition of methanogenic archaea in wet areas. Soils (organic layers) were sampled in July 2016 from 10 cm depth in the same wet areas as the CH<sub>4</sub> production incubation experiment in triplicate. Then, microbial communities in the samples were analyzed by amplicon sequencing of 16S rRNA gene. See Fig. 8 for a plot by the level of orders.

| Order              | Family                     | Genus                                     | Relative abundance in the total sequences (%) |                         |                         |                      |                      |                      |                      |                      |                      |                      |                      |                      |
|--------------------|----------------------------|-------------------------------------------|-----------------------------------------------|-------------------------|-------------------------|----------------------|----------------------|----------------------|----------------------|----------------------|----------------------|----------------------|----------------------|----------------------|
|                    |                            |                                           | sphagnu<br>m_K<br>(S01)                       | sphagnu<br>m_K<br>(S02) | sphagnu<br>m_K<br>(S03) | sedge<br>_V<br>(S07) | sedge<br>_V<br>(S08) | sedge<br>_V<br>(S09) | sedge<br>_K<br>(S04) | sedge<br>_K<br>(S05) | sedge<br>_K<br>(S06) | sedge<br>_B<br>(S10) | sedge<br>_B<br>(S11) | sedge<br>_B<br>(S12) |
| Methanosarcinales  | Methanosarcinaceae         | <i>Methanosarcina</i>                     | 0.01                                          | 0.00                    | 0.00                    | 0.21                 | 0.09                 | 0.47                 | 0.06                 | 0.08                 | 0.08                 | 0.25                 | 0.20                 | 0.16                 |
|                    | Methanosaetaceae           | <i>Methanosaeta</i>                       | 0.00                                          | 0.00                    | 0.00                    | 0.00                 | 0.13                 | 0.06                 | 0.74                 | 0.80                 | 0.93                 | 0.82                 | 0.91                 | 0.78                 |
| Methanomicrobiales | Methanoregulaceae          | <i>Candidatus</i><br><i>Methanoregula</i> | 0.00                                          | 0.00                    | 0.00                    | 0.09                 | 0.07                 | 0.10                 | 0.10                 | 0.10                 | 0.11                 | 0.23                 | 0.32                 | 0.28                 |
|                    | Methanospirillaceae        | <i>Methanospirillum</i>                   | 0.00                                          | 0.00                    | 0.00                    | 0.00                 | 0.00                 | 0.01                 | 0.00                 | 0.00                 | 0.00                 | 0.02                 | 0.00                 | 0.01                 |
|                    | Methanoregulaceae          | Other<br><i>Methanoregulaceae</i>         | 0.00                                          | 0.00                    | 0.00                    | 0.00                 | 0.01                 | 0.01                 | 0.00                 | 0.02                 | 0.01                 | 0.08                 | 0.08                 | 0.05                 |
| Methanocellales    |                            | <i>Methanocellales</i>                    | 0.00                                          | 0.00                    | 0.00                    | 0.00                 | 0.00                 | 0.00                 | 0.07                 | 0.07                 | 0.09                 | 0.00                 | 0.00                 | 0.00                 |
| Methanobacteriales | Methanobacteriaceae        | <i>Methanobacterium</i>                   | 0.07                                          | 0.00                    | 0.12                    | 0.16                 | 0.15                 | 0.40                 | 1.11                 | 1.11                 | 1.49                 | 0.93                 | 0.47                 | 0.66                 |
| E2                 | [Methanomassiliicoccaceae] | [Methanomassiliicoccaceae]                | 0.01                                          | 0.00                    | 0.00                    | 0.04                 | 0.02                 | 0.03                 | 0.07                 | 0.07                 | 0.08                 | 0.08                 | 0.06                 | 0.05                 |



**Table S6.** Redox potential observed in summers 2012 and 2013 by ORP meter (RM-20P or RM-30P, DKK-TOA Corporation, Japan) connected with an ORP electrode (PST-2739C). Measurement accuracy of the ORP meter is  $\pm 10$  mV. Redox potential value was accepted when the potential stabilized after installing the ORP electrode into the soil.

| Observation points       | Depth (cm) | Redox potential (mV versus the normal hydrogen electrode) |              |
|--------------------------|------------|-----------------------------------------------------------|--------------|
|                          |            | 2012                                                      | 2013         |
| tree mound_K             | 10         | 608 to 643                                                | 478 to 482   |
|                          | 20         | 627 to 631                                                | —            |
| sphagnum_K<br>(wet area) | 10         | -183 to 814                                               | 547 to 617   |
|                          | 20         | -129                                                      | —            |
| sedge_K<br>(wet area)    | 10         | -177 to -121                                              | -114 to -69  |
|                          | 20         | -250 to -78                                               | -223 to -194 |
|                          | 30         | -152 to -118                                              | —            |
| sedge_B<br>(wet area)    | 10         | —                                                         | -113 to -102 |
